# Supplementary material
Source: publisher figshare collection journal article supplement (https://sage.figshare.com/articles/dataset/_/8311469)
Supplement: Supplementary file 1 [file 15572714]

Appendix Table A1: Significant Odds of Having Lower PROM Score for Explanatory and Co-Variates in Model (IKDC and KOOS PROMs)<sup>a</sup>

| Patient Demographics                          | Comparison                             | Reference Category | IKDC<br>(n = 937)                       | KOOS                                    |                                         |                                          |                                         |                                         |
|-----------------------------------------------|----------------------------------------|--------------------|-----------------------------------------|-----------------------------------------|-----------------------------------------|------------------------------------------|-----------------------------------------|-----------------------------------------|
|                                               |                                        |                    |                                         | Symptoms<br>(n = 937)                   | Pain<br>(n = 935)                       | ADL<br>(n = 937)                         | Sports/Rec<br>(n = 911)                 | QoL<br>(n = 940)                        |
| Two-year sport participation <sup>b</sup>     | Multiple sports vs No sport            | Multiple sports    | 3.73<br>(2.64-5.28)<br><i>P</i> < .0001 | 2.25<br>(1.62-3.15)<br><i>P</i> < .0001 | 2.28<br>(1.62-3.19)<br><i>P</i> < .0001 | 2.39<br>(1.67-3.41)<br><i>P</i> < 0.0001 | 2.31<br>(1.60-3.35)<br><i>P</i> < .0001 | 3.29<br>(2.31-4.67)<br><i>P</i> < .0001 |
|                                               | Single sport vs No sport               | Single sport       | 2.41<br>(1.62-3.58)<br><i>P</i> < .0001 | 1.77<br>(1.18-2.64)<br><i>P</i> = .005  | 1.94<br>(1.32-2.87)<br><i>P</i> = .001  | 1.98<br>(1.34-2.94)<br><i>P</i> = .001   | 1.79<br>(1.19-2.70)<br><i>P</i> = .006  | 2.70<br>(1.81-4.03)<br><i>P</i> < .0001 |
| Baseline sport participation <sup>b</sup>     | Multiple sports vs Single sport        | Multiple sports    |                                         |                                         |                                         |                                          | 0.61<br>(0.43-0.86)<br><i>P</i> = 0.005 |                                         |
| Baseline outcome score                        | Continuous variable                    |                    | 1.04<br>(1.04-1.05)<br><i>P</i> < .0001 | 1.04<br>(1.04-1.05)<br><i>P</i> < .0001 | 1.05<br>(1.04-1.06)<br><i>P</i> < .0001 | 1.05<br>(1.04-1.06)<br><i>P</i> < .0001  | 1.03<br>(1.02-1.03)<br><i>P</i> < .0001 | 1.03<br>(1.02-1.04)<br><i>P</i> < .0001 |
| Baseline activity score (MARX activity scale) | Continuous variable                    |                    | 1.04<br>(1.02-1.08)<br><i>P</i> = .001  |                                         |                                         |                                          | 1.03<br>(1.01-1.06)<br><i>P</i> = .021  | 1.03<br>(1.01-1.06)<br><i>P</i> = .019  |
| Sex                                           | Female vs Male                         | Male               | 1.44<br>(1.11-1.87)<br><i>P</i> = .006  |                                         |                                         |                                          |                                         |                                         |
| BMI                                           | Continuous variable                    |                    | 0.96<br>(0.92-0.99)<br><i>P</i> = .012  |                                         |                                         | 0.96<br>(0.93-1.00)<br><i>P</i> = .027   |                                         |                                         |
| Time since last ACLR, y                       | Continuous variable                    |                    | 1.05<br>(1.02-1.08)<br><i>P</i> = .001  | 1.07<br>(1.04-1.09)<br><i>P</i> < .0001 | 1.06<br>(1.3-1.09)<br><i>P</i> < .0001  | 1.06<br>(1.03-1.10)<br><i>P</i> < .0001  | 1.06<br>(1.03-1.09)<br><i>P</i> < .0001 |                                         |
| Smoking                                       | Never vs Current                       | Never Smoker       |                                         |                                         |                                         |                                          |                                         | 1.54<br>(1.03-2.30)<br><i>P</i> = .037  |
| Meniscal Treatment (previous)                 | Medial                                 | No tear            |                                         | 1.32<br>(1.01-1.75)<br><i>P</i> = .046  | 1.39<br>(1.03-1.87)<br><i>P</i> = .030  |                                          |                                         |                                         |
|                                               | Lateral                                | No tear            | 1.50<br>(1.03-2.20)<br><i>P</i> = .036  | 1.81<br>(1.27-2.59)<br><i>P</i> = .001  | 1.52<br>(1.07-2.17)<br><i>P</i> = .020  |                                          | 1.48<br>(1.02-2.15)<br><i>P</i> = .041  | 1.79<br>(1.24-2.59)<br><i>P</i> = .002  |
|                                               | No tear vs unstable, not healed repair | No tear            | 2.17<br>(1.03-4.55)<br><i>P</i> = .041  | 2.82<br>(1.18-6.79)<br><i>P</i> = .021  | 3.04<br>(1.33-6.96)<br><i>P</i> = .008  | 2.60<br>(1.20-5.62)<br><i>P</i> = .015   |                                         | 2.04<br>(1.03-4.05)<br><i>P</i> = .042  |

| Comparison                                                      | Reference Category                               | IKDC<br>(n = 937)   | KOOS                            |                                 |                                          |                                 |                  |
|-----------------------------------------------------------------|--------------------------------------------------|---------------------|---------------------------------|---------------------------------|------------------------------------------|---------------------------------|------------------|
|                                                                 |                                                  |                     | Symptoms<br>(n = 937)           | Pain<br>(n = 935)               | ADL<br>(n = 937)                         | Sports/Rec<br>(n = 911)         | QoL<br>(n = 940) |
| Articular cartilage injury (current)<br>Lateral femoral condyle | <b>Normal/G1 vs<br/>Injury/G2-G4<sup>c</sup></b> | <b>Injury/G2-G4</b> |                                 |                                 | <b>1.36<br/>(1.01-1.84)<br/>P = .045</b> |                                 |                  |
| Trochlear                                                       | Normal/G1 vs<br>Injury/G2-G4 <sup>c</sup>        | Normal/G1           | 1.41<br>(1.02-1.97)<br>P = .038 | 1.47<br>(1.03-2.12)<br>P = .035 | 1.83<br>(1.32-2.56)<br>P < .0001         | 1.45<br>(1.04-2.03)<br>P = .029 |                  |

Significant Odds of Having Lower PROM Score for Explanatory and Co-Variates in Model (MARX and WOMAC PROMs)<sup>a</sup>

| Patient Demographics                      | Comparison                         | Reference Category | MARX<br>(n = 940)                | WOMAC                            |                                  |                                  |
|-------------------------------------------|------------------------------------|--------------------|----------------------------------|----------------------------------|----------------------------------|----------------------------------|
|                                           |                                    |                    |                                  | Stiffness<br>(n = 937)           | Pain<br>(n = 935)                | ADL<br>(n = 937)                 |
| Two-year sport participation <sup>b</sup> | Multiple sports vs<br>No sport     | Multiple sports    | 5.68<br>(3.93-8.21)<br>P < .0001 | 2.00<br>(1.39-2.89)<br>P < .0001 | 1.99<br>(1.37-2.87)<br>P < .0001 | 2.39<br>(1.68-3.41)<br>P < .0001 |
|                                           |                                    |                    | Single sport vs<br>No sport      | Single sport                     | 3.77<br>(2.48-5.75)<br>P < .0001 | 1.84<br>(1.22-2.80)<br>P = .004  |
|                                           | Multiple sports vs<br>Single Sport | Multiple sports    | 1.51<br>(1.07-2.11)<br>P = .018  | 1.48<br>(1.07-2.06)<br>P = .019  |                                  |                                  |
| Baseline sport participation <sup>b</sup> | Multiple sports vs<br>Single sport | Multiple sports    | 0.61<br>(0.43-0.87)<br>P = .006  |                                  |                                  |                                  |
|                                           | Single sport vs<br>No sport        | Single Sport       | 2.02<br>(1.21-3.37)<br>P = .007  |                                  |                                  |                                  |
| Baseline outcome score                    | Continuous variable                |                    | 1.12<br>(1.10-1.15)<br>P < .0001 | 1.04<br>(1.03-1.05)<br>P < .0001 | 1.05<br>(1.04-1.06)<br>P < .0001 | 1.05<br>(1.04-1.06)<br>P < 0.001 |
| Sex                                       | Female vs male                     | Male               | 1.72<br>(1.32-2.24)<br>P < .0001 |                                  |                                  |                                  |
| BMI                                       | Continuous                         |                    |                                  |                                  |                                  | 0.96                             |

|                                                  |                                                     |                              |                |                                                             |                                                             |                                                             |
|--------------------------------------------------|-----------------------------------------------------|------------------------------|----------------|-------------------------------------------------------------|-------------------------------------------------------------|-------------------------------------------------------------|
|                                                  | variable                                            |                              |                |                                                             | (0.93-1.00)                                                 |                                                             |
| Time since last ACLR, y                          | Continuous variable                                 |                              |                | 1.06<br>(1.03-1.09)<br><i>P</i> < .0001                     | 1.05<br>(1.02-1.08)<br><i>P</i> = .001                      | 1.06<br>(1.03-1.10)<br><i>P</i> < .0001                     |
| Meniscal Treatment (previous)                    |                                                     |                              |                |                                                             |                                                             |                                                             |
| Medial                                           | No tear vs excised                                  | No tear                      |                | 1.44<br>(1.08-1.93)<br><i>P</i> = .014                      |                                                             |                                                             |
|                                                  | <b>No tear vs stable, healed repair<sup>c</sup></b> | <b>Stable, healed repair</b> |                | <b>2.51</b><br><b>(1.20-5.25)</b><br><b><i>P</i> = .015</b> |                                                             |                                                             |
| Lateral                                          | No tear vs excised                                  | No tear                      |                | 1.50<br>(1.04-2.15)<br><i>P</i> = .029                      | 1.45<br>(1.01-2.09)<br><i>P</i> = .047                      |                                                             |
|                                                  | No tear vs unstable, not healed repair              | No tear                      |                | 2.83<br>(1.19-6.70)<br><i>P</i> = .018                      | 3.53<br>(1.22-10.27)<br><i>P</i> = .020                     | 2.60<br>(1.20-5.62)<br><i>P</i> = .015                      |
| WOMAC                                            |                                                     |                              |                |                                                             |                                                             |                                                             |
|                                                  | Comparison                                          | Reference Category           | MARX (n = 940) | Symptoms (n = 937)                                          | Pain (n = 935)                                              | ADL (n = 937)                                               |
| Meniscal injury (at time of revision)            |                                                     |                              |                |                                                             |                                                             |                                                             |
| <b>Lateral</b>                                   | <b>No tear vs Tear<sup>c</sup></b>                  | <b>Tear</b>                  |                |                                                             | <b>1.32</b><br><b>(1.01-1.74)</b><br><b><i>P</i> = .042</b> |                                                             |
| Articular cartilage injury (at time of revision) |                                                     |                              |                |                                                             |                                                             |                                                             |
| <b>Lateral femoral condyle</b>                   | <b>Normal/G1 vs Injury/G2-G4</b>                    | <b>Injury/G2-G4</b>          |                |                                                             |                                                             | <b>1.36</b><br><b>(1.01-1.84)</b><br><b><i>P</i> = .045</b> |

<sup>a</sup>Results are expressed as odd ratio and their 95% CIs. Nonsignificant findings are expressed as empty cells if the listed variable in the left (first) column did not have a significant impact on the patient reported outcome measure (top row). ACLR, Anterior cruciate ligament reconstruction; ADL, Activities of Daily Living; BMI, Body Mass Index; IKDC, International Knee Documentation Committee Subjective Form; KOOS, Knee Injury and Osteoarthritis Outcome Score; PROMs, Patient Reported Outcome Measures; QoL, quality of life; Sports/Rec, Sports & Recreation subscale; T<sub>0</sub>, Time of revision (enrollment); WOMAC, Western Ontario and McMaster Universities Osteoarthritis Index.

<sup>b</sup>No sport participation were individuals who reported no primary or secondary sport participation, single sport participation were individuals who only reported a single sport participation, Multi-sport participation were individuals who reported more than one sport or other sport in their primary and secondary sport participation.

<sup>c</sup>Variables were treated as binary as normal/grade one articular cartilage injury or grade two through four articular cartilage injury as identified by the orthopedic surgeon during revision surgery. Bolded variables and values represent results that were opposite to the initial hypothesis.
